# Supplementary material
Source: publisher figshare collection journal article supplement (https://acs.figshare.com/ndownloader/files/3869746)
Supplement: Supplementary file 1 [file 3869746]

## Supporting Information

# Formation of [4Fe-4S] clusters in the mitochondrial iron-sulfur cluster assembly machinery

Diego Brancaccio<sup>†</sup>, Angelo Gallo<sup>‡,§</sup>, Maciej Mikolajczyk<sup>‡,§</sup>, Kairit Zovo<sup>¶</sup>, Peep Palumaa<sup>¶</sup>, Ettore Novellino<sup>†</sup>, Mario Piccioli<sup>‡,§</sup>, Simone Ciofi-Baffoni<sup>‡,§</sup> and Lucia Banci<sup>‡,§,\*</sup>

<sup>†</sup>Dipartimento di Farmacia, Università di Napoli “Federico II”, Via D. Montesano 49, 80131 Napoli, Italy, <sup>‡</sup>Department of Chemistry, University of Florence, Via della Lastruccia 3, 50019 Sesto Fiorentino, Florence, Italy, <sup>§</sup>Magnetic Resonance Center CERM, University of Florence, Via Luigi Sacconi 6, 50019, Sesto Fiorentino, Florence, Italy, <sup>¶</sup>Department of Gene Technology, Tallinn University of Technology, Akadeemia tee 15, 12618 Tallinn, Estonia

\*To whom correspondence should be addressed: [banci@cerm.unifi.it](mailto:banci@cerm.unifi.it)

## Table of Contents:

**Table S1.** Parameters of the data-driven docking model of dimeric apo human ISCA2 (pg S1)

**Figure S1.** Temperature dependence of the chemical shifts for the hyperfine-shifted signals of the three different species (A, B, C) of chemically reconstituted [4Fe-4S] hISCA2 (pg S2)

**Figure S2.** Changes in the redox conditions affect the nature of the cluster bound to hISCA2 (pg S3)

**Figure S3.** Monitoring the switching from homodimeric hISCA2 to heterodimeric hISCA1/hISCA2 complex by NMR (pg S4)

## Supporting Information

**Table S1.** Parameters of the data-driven docking model of dimeric apo human ISCA2.

| <b>HADDOCK parameters for Cluster 1 (all)</b>         | <b>Values</b>   |
|-------------------------------------------------------|-----------------|
| HADDOCK score                                         | -83.1 +/- 1.9   |
| Cluster size                                          | 200             |
| RMSD from the overall lowest-energy structure (Å)     | 0.8 +/- 0.5     |
| Van der Waals energy (kcal mol <sup>-1</sup> )        | -44.8 +/- 2.4   |
| Electrostatic energy (kcal mol <sup>-1</sup> )        | -206.8 +/- 27.4 |
| Desolvation energy (kcal mol <sup>-1</sup> )          | 2.8 +/- 5.9     |
| Restraints violation energy (kcal mol <sup>-1</sup> ) | 3.0 +/- 1.47    |
| Buried Surface Area (Å <sup>2</sup> )                 | 1240.9 +/- 70.5 |
| Z-Score                                               | 0.0             |

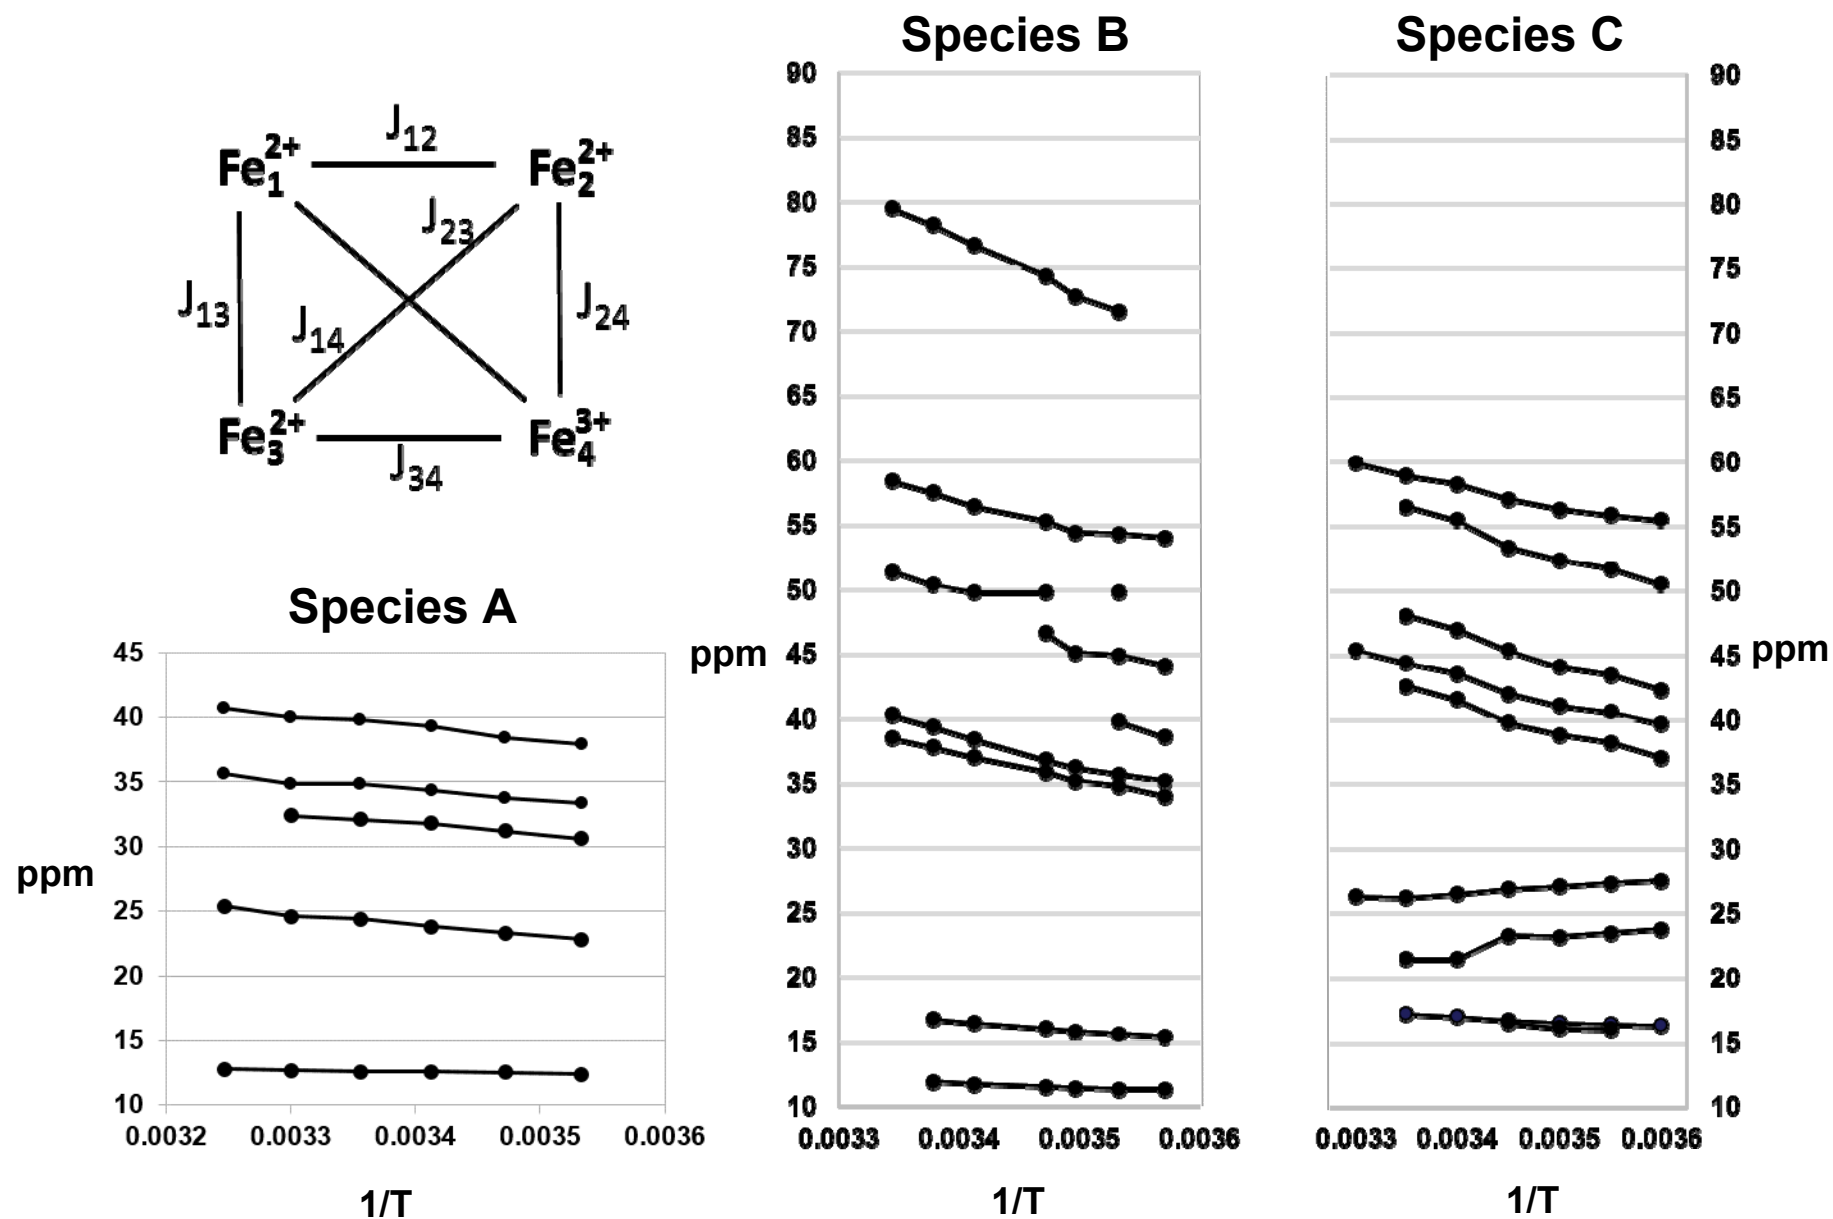

**Figure S1.** Temperature dependence of the chemical shifts for the hyperfine-shifted signals of the three different species (A,B,C) of chemically reconstituted [4Fe-4S] hISCA2. Experiments were recorded at 600 MHz, pH 7.0 in the temperature range of 280-308 K. A schematic representation of [4Fe-4S] cluster and its coupling scheme in the reduced state [4Fe-4S]<sup>+</sup> is also shown (upper left panel).

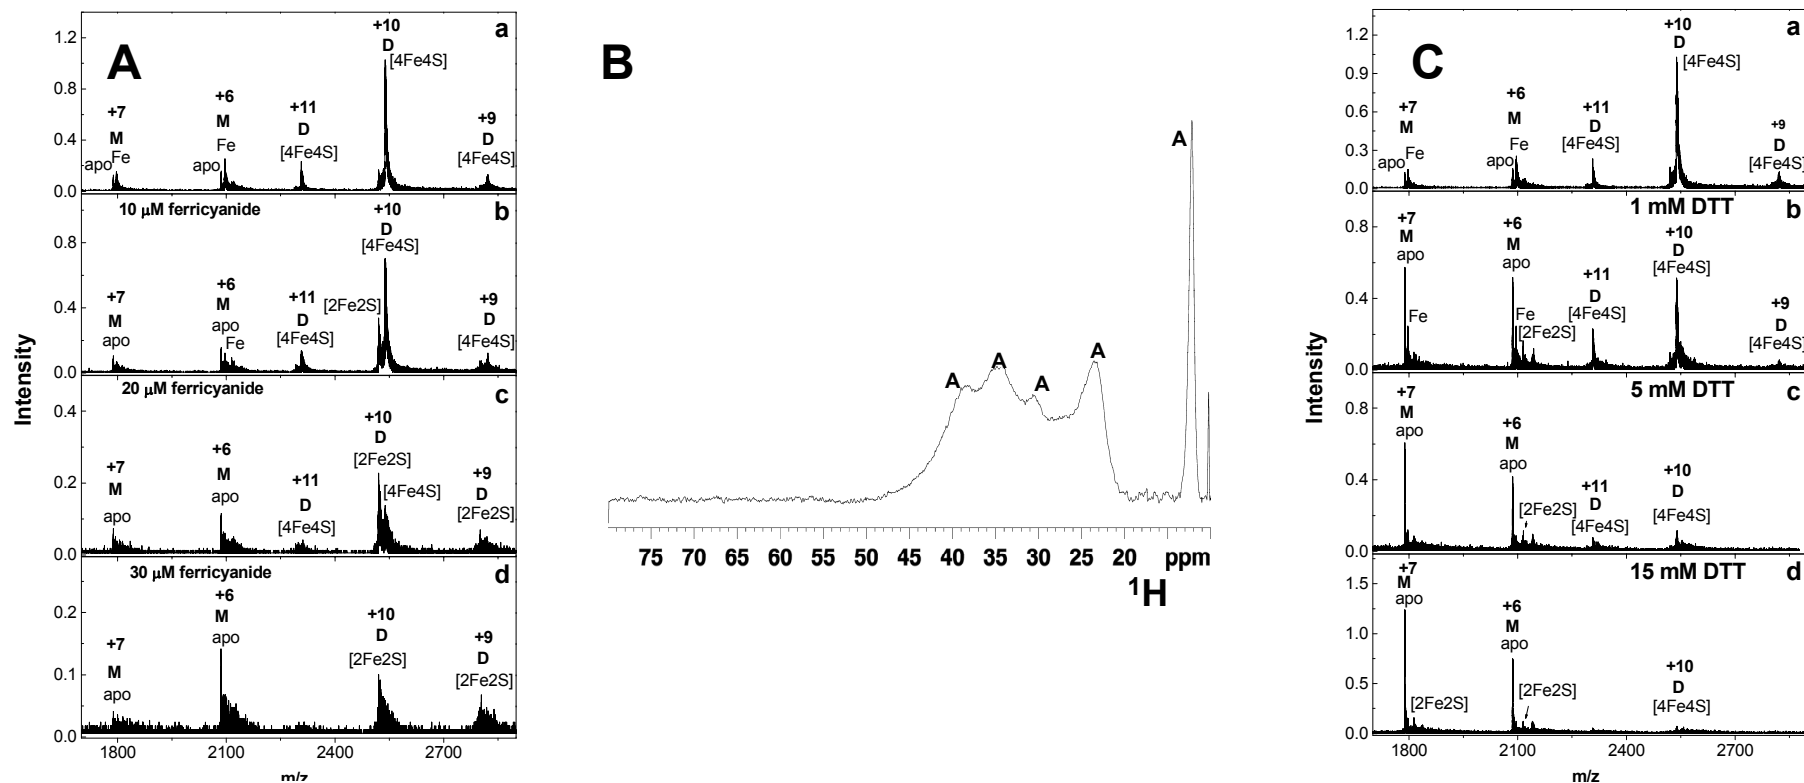

**Figure S2. Changes in the redox conditions affect the nature of the cluster bound to hISCA2.** (A) ESI-MS spectra of [4Fe-4S] hISCA2 in the presence of ferricyanide. Conditions: 20 mM ammonium acetate, pH 7.5, T = 25°C. Chemically reconstituted 20 μM [4Fe-4S] hISCA2 in the absence (a) and in the presence of 10 μM ferricyanide (b); 20 μM ferricyanide (c) or 30 μM ferricyanide (d). +7 and +6 charge states are presented for apo and Fe hISCA2 monomer (M); +11, +10 and +9 charge states are presented for holo hISCA2 dimer (D). Metal or iron-sulfur cluster contents are indicated on the top of the peaks. (B) Paramagnetic 1D  $^1\text{H}$  NMR spectrum of chemically reconstituted [4Fe-4S] hISCA2 after the addition of 1 equivalent of ferricyanide in 50 mM phosphate buffer pH 7.0 at 600 MHz and 283 K. Signals labeled A arise from H $\beta$  and H $\alpha$  from cysteine ligands coordinated to a [2Fe-2S] $^{2+}$  cluster. (C) ESI-MS spectra of [4Fe-4S] hISCA2 in the presence of DTT. Conditions: 20 mM ammonium acetate, pH 7.5, T = 25°C. Chemically reconstituted 20 μM [4Fe-4S] hISCA2 in the absence (a) and in the presence of 1 mM DTT (b); 5 mM DTT (c) or 15 mM DTT (d). +7 and +6 charge states are presented for apo and Fe hISCA2 monomer (M); +11, +10 and +9 charge states are presented for holo hISCA2 dimer (D). Metal or iron-sulfur cluster contents are indicated on the top of the peaks.

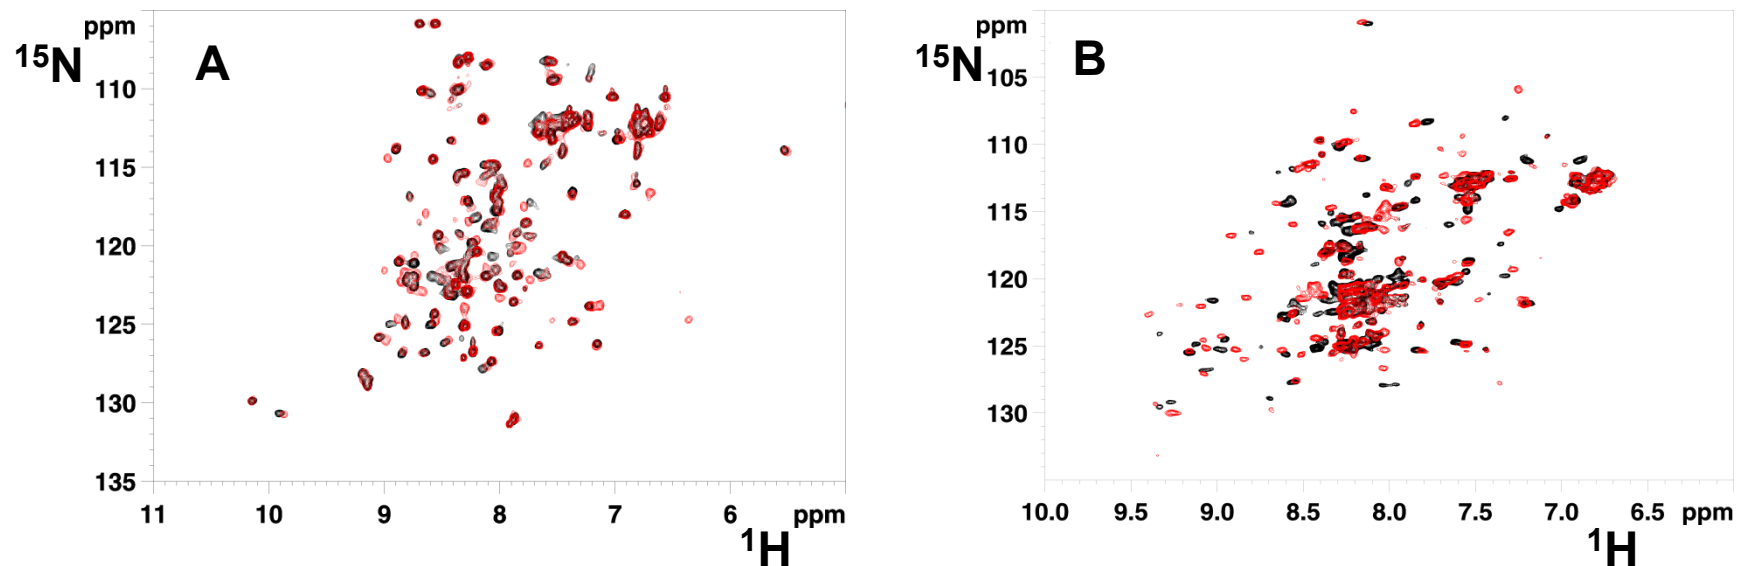

**Figure S3. Monitoring the switching from homodimeric hISCA2 to heterodimeric hISCA1/hISCA2 complex by NMR.** (A) Superimposition of  $^1\text{H}$ - $^{15}\text{N}$  HSQC spectra of  $^{15}\text{N}$ -labelled apo hISCA2 free (black) and in a 1:1 complex with unlabelled apo hISCA1 (red). (B) Superimposition of  $^1\text{H}$ - $^{15}\text{N}$  HSQC spectra of  $^{15}\text{N}$ -labelled apo hISCA1 free (black) and in a 1:1 complex with unlabelled apo hISCA2 (red).
